# Supplementary material for: Bulky cations greatly increase the turnover of a native hammerhead ribozyme
Source: Royal Society of Chemistry journal article supplement (doi:10.1039/c9ra06797c), 2019-01-01
Supplement: c9ra06797c1.pdf [file c9ra06797c1.pdf]

## Bulky cations greatly increase the turnover of a native hammerhead ribozyme

Shu-ichi Nakano, Hirofumi Yamashita, Kazuya Tanabe, and Naoki Sugimoto

*Department of Nanobiochemistry, Faculty of Frontiers of Innovative Research in Science and Technology (FIRST), Konan University, 7-1-20, Minatojima-minamimachi, Chuo-ku, Kobe, 650-0047, Japan*

*Frontier Institute for Biomolecular Engineering Research (FIBER), Konan University, 7-1-20, Minatojima-minamimachi, Chuo-ku, Kobe, 650-0047, Japan*

### Electronic supporting information

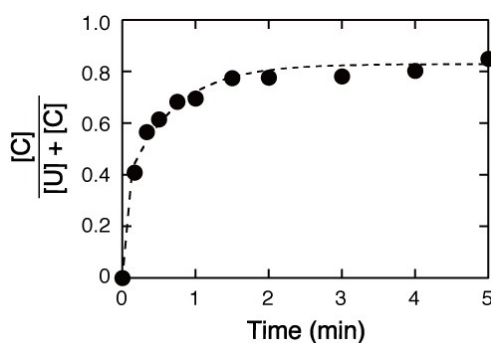

**Fig. S1** The kinetic trace of the ribozyme-catalyzed substrate cleavage under the single-turnover condition conducted with 10 mM  $\text{MgCl}_2$  at 37°C. The relative proportions of the populations that cleave fast and slowly are about 1:1.

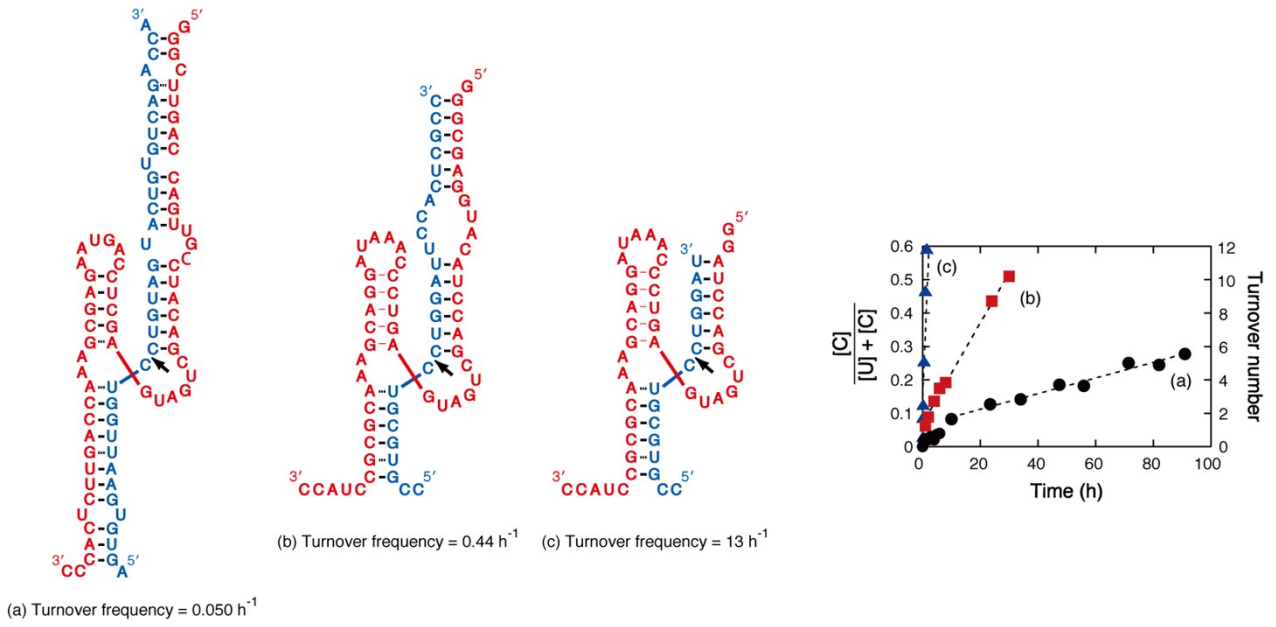

**Fig. S2** The ribozyme-substrate complexes formed by HH10 and short ribozyme constructs derived from *Schistosoma mansoni*. Kinetic traces and the turnover frequencies at 10 mM  $\text{MgCl}_2$  at  $37^\circ\text{C}$  are also presented.

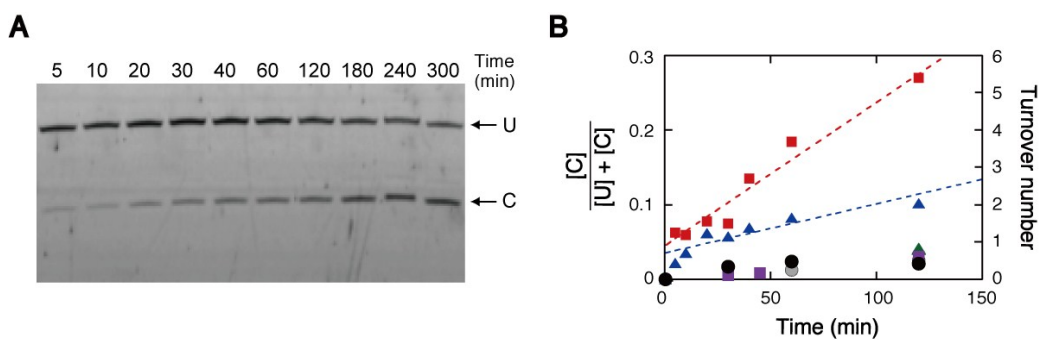

**Fig. S3** (A) Polyacrylamide gel electrophoresis of the ribozyme-catalyzed substrate cleavage under multiple-turnover conditions in the presence of 100 mM TPeA. The upper and lower bands are uncleaved substrates and cleaved fragments, respectively. (B) Kinetic traces for substrate cleavage under multiple-turnover conditions in the absence (black circles) and presence of TMA (gray circles), TEA (green triangles), TPrA (purple squares), TBA (blue triangles), or TPeA (red squares) at 100 mM.
